# Supplementary material for: The Comprehensive Approach to Preparation and Investigation of the Eu3+ Doped Hydroxyapatite/poly(L-lactide) Nanocomposites: Promising Materials for Theranostics Application
Source: PubMed Central journal article supplement (PMC6724068; doi:10.3390/nano9081146), 2019-08-10
Supplement: nanomaterials-09-01146-s001.pdf [file nanomaterials-09-01146-s001.pdf]

1 *Supplementary information*

2 **The Comprehensive Approach to Preparation and**  
 3 **Investigation of the Eu<sup>3+</sup> Doped**  
 4 **Hydroxyapatite/poly(L-lactide) Nanocomposites:**  
 5 **Promising Materials for Theranostics Application**

6 **Katarzyna Szyszka**<sup>1</sup>, **Sara Targonska**<sup>1</sup>, **Malgorzata Gazinska**<sup>2</sup>, **Konrad Szustakiewicz**<sup>2</sup> and **Rafal**  
 7 **J. Wiglusz**<sup>1,3,\*</sup>

8 <sup>1</sup> Institute of Low Temperature and Structure Research, Polish Academy of Science, ul. Okolna 2, 50-422  
 9 Wroclaw, Poland

10 <sup>2</sup> Wroclaw University of Science and Technology, Polymer Engineering and Technology Division, Wyb.  
 11 Wyspianskiego 27, 50-370 Wroclaw, Poland

12 <sup>3</sup> Centre for Advanced Materials and Smart Structures, Polish Academy of Sciences, Okolna 2, 50-950  
 13 Wroclaw, Poland

14 \* Correspondence: r.wiglusz@intibs.pl; Tel.: +48-071-3954-159

15 Received: 3 July 2019; Accepted: 6 August 2019; Published: date

16 **S3. Results**

17 *S3.1. Morphology*

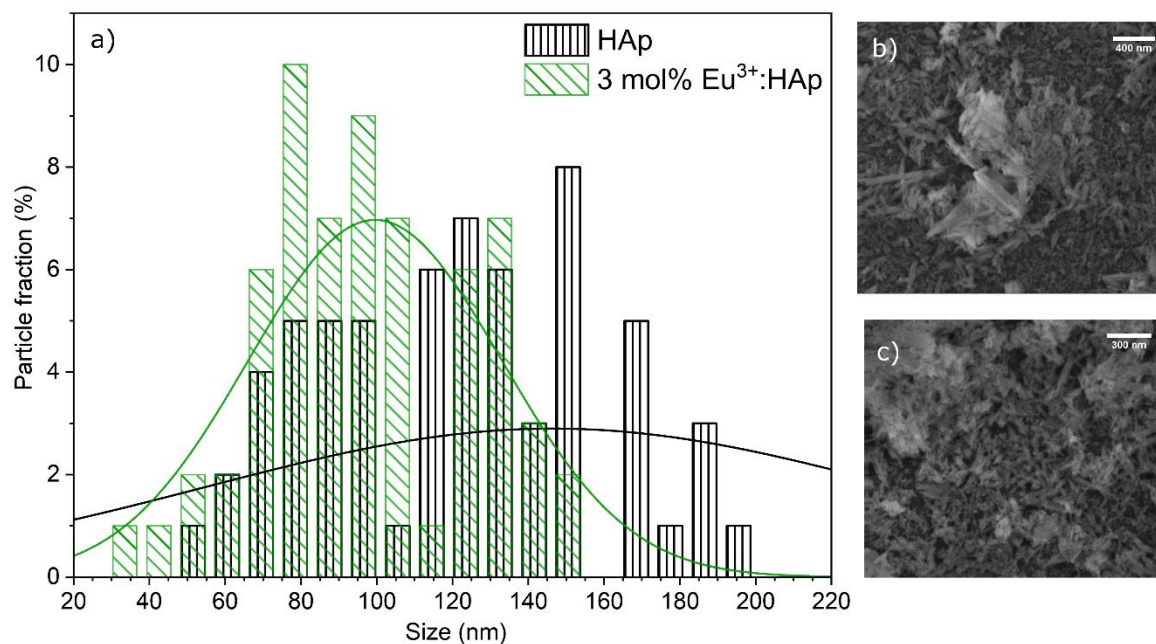

18

19 **Figure S1.** Particle size distribution based on SEM images (a), SEM image of HAp (b) and 3 mol% Eu<sup>3+</sup>:HAp  
 20 particles (c).

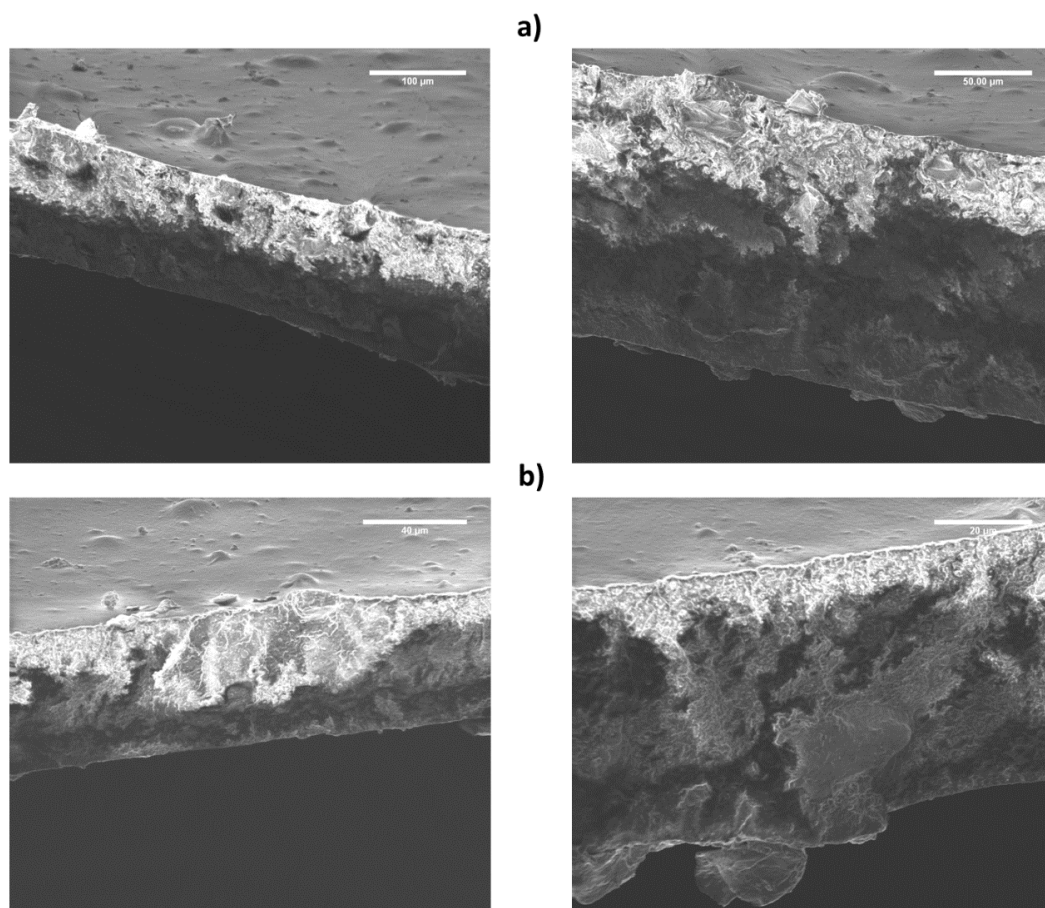

21  
22

**Figure S2.** SEM images of breakthroughs for PLLA/HAp (a) and PLLA/5 mol% Eu<sup>3+</sup>:HAp (b).

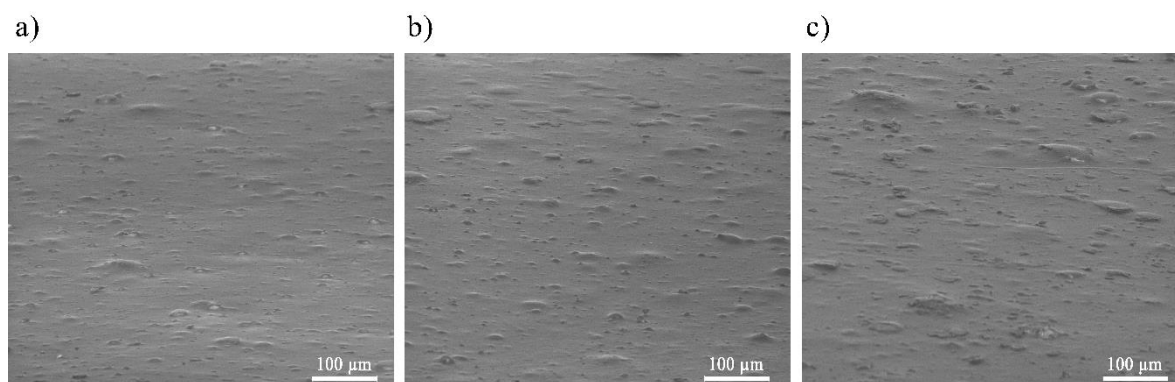

23

24  
25

**Figure S3.** SEM images of composite surface for PLLA/1 mol% Eu<sup>3+</sup>:HAp (a), PLLA/3 mol% Eu<sup>3+</sup>:HAp (b), PLLA/5 mol% Eu<sup>3+</sup>:HAp (c).

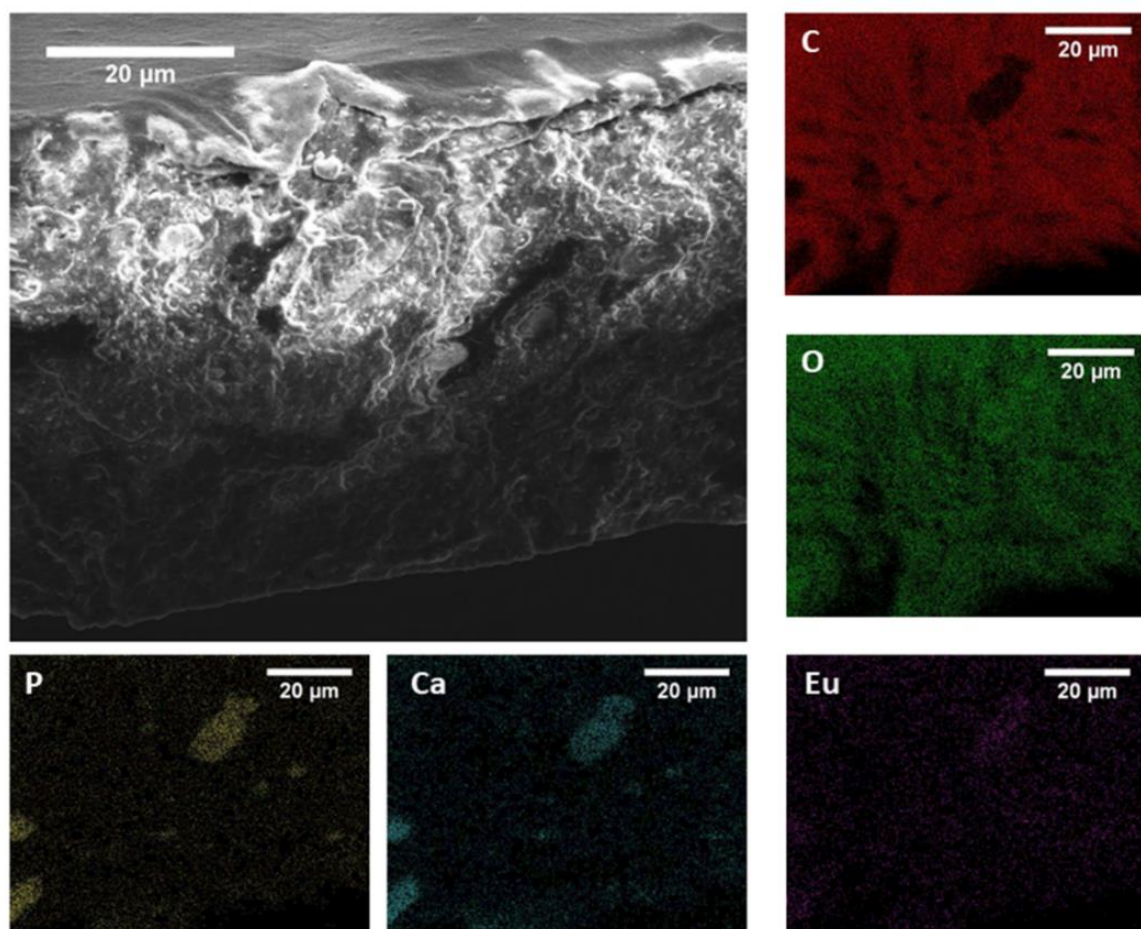

26

27

**Figure S4.** SEM-EDS element maps of the PLLA/5 mol%  $\text{Eu}^{3+}$ :HAp composites.

### 28 S3.2. Structural analysis of $\text{Eu}^{3+}$ doped composites

29 The crystal phase purity of  $\text{Ca}_{10}(\text{PO}_4)_6(\text{OH})_2$  nanocrystals doped with  $\text{Eu}^{3+}$  ions were checked by  
30 the powder XRD technique and compared with the reference standard of the  $\text{Ca}_{10}(\text{PO}_4)_6(\text{OH})_2$  host  
31 lattice (ICSD – 180315 [1]). All synthesised nanoapatites were characterised by detectable crystallinity  
32 at entire range of proposed dopant concentration (**Figure S5**). Moreover, no extra diffraction peaks  
33 corresponding to any impurities were detected, which means that the single crystalline phase of  
34 hydroxyapatites in entire range of proposed dopant concentration of optically active ions were  
35 obtained. Based on the recorded diffraction patterns, it is possible to affirm that  $\text{Eu}^{3+}$  ions were  
36 successfully incorporated into the host lattice by occupying the  $\text{Ca}^{2+}$  ions' sites as well as that  
37 incorporating of  $\text{Eu}^{3+}$  ions with different concentrations does not have destabilize impact on the  
38 hydroxyapatite crystal structure. It means that  $\text{Eu}^{3+}$  ions are well-dissolved in the host lattice.

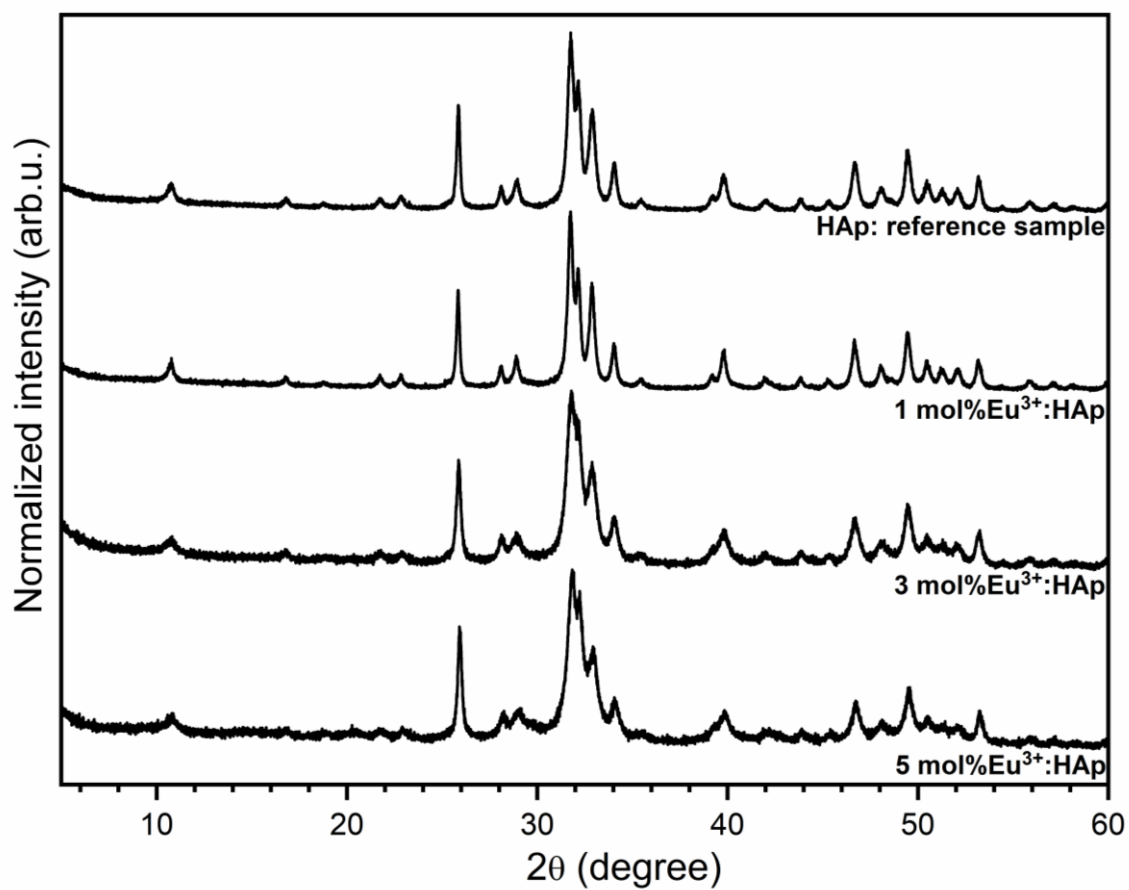

39

40

**Figure S5.** X-ray powder diffraction patterns of  $x$  mol%  $\text{Eu}^{3+}:\text{Ca}_{10}(\text{PO}_4)_6(\text{OH})_2$  (where  $x = 0 - 5$ ).

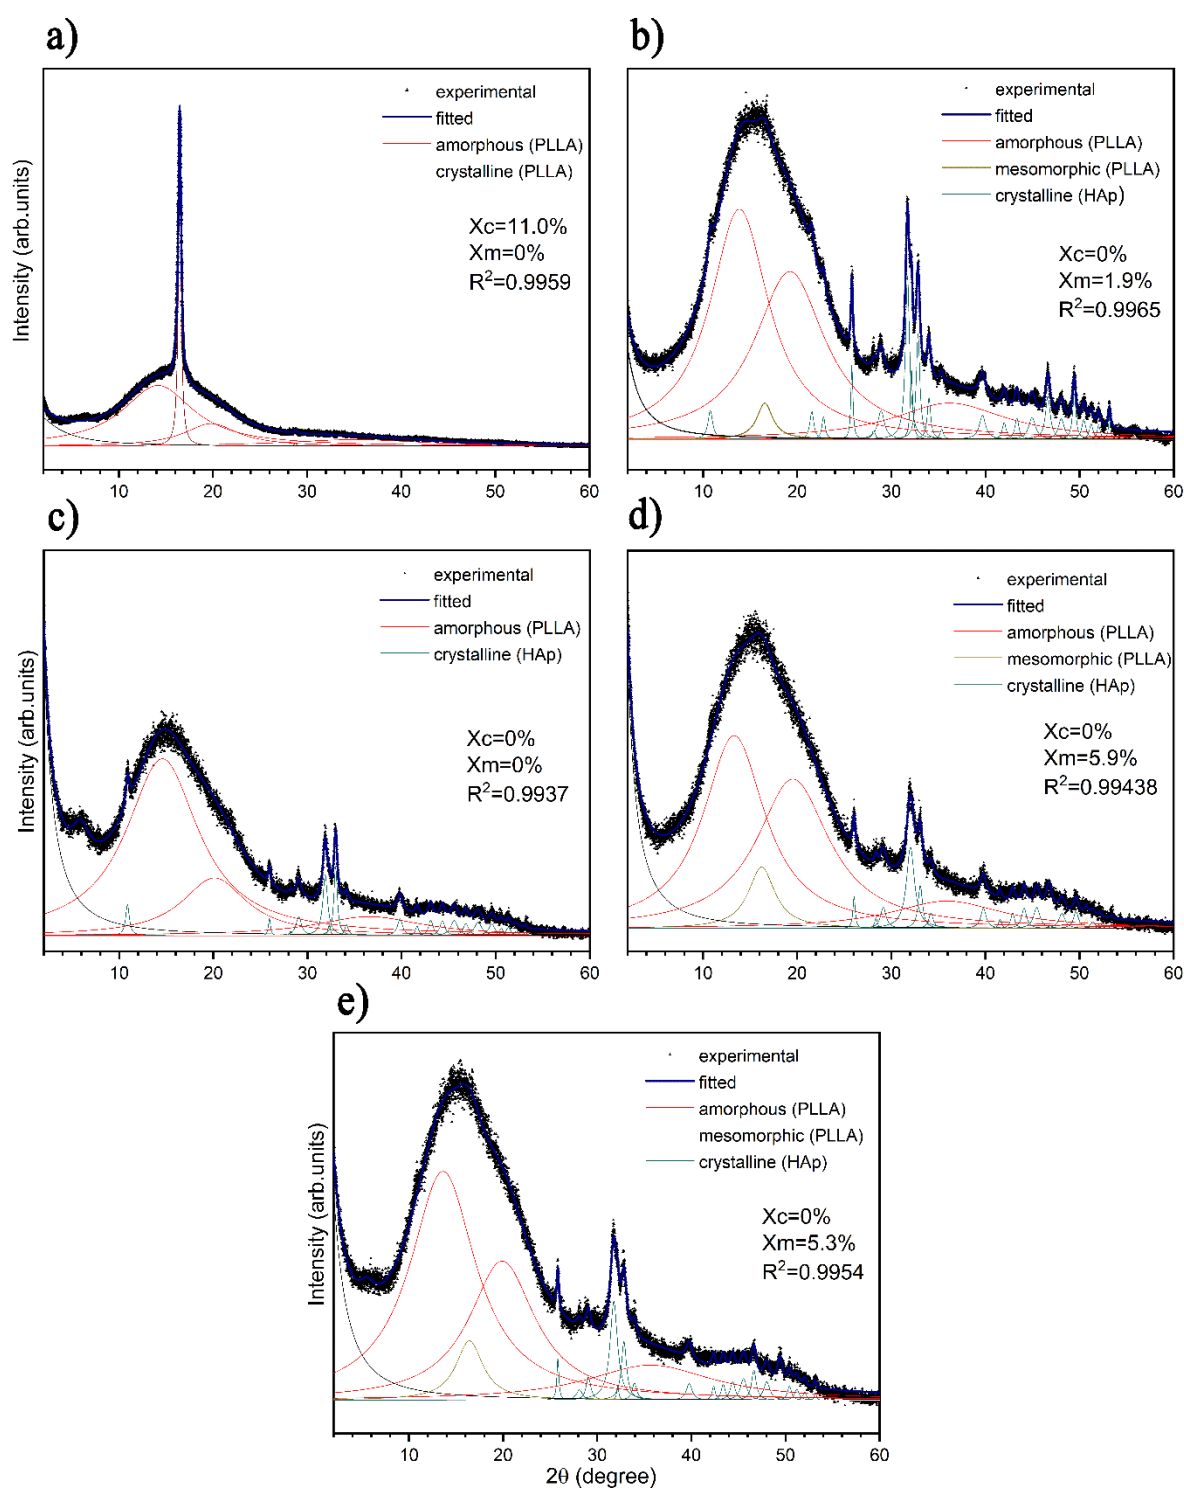

41

42

43

**Figure S6.** Deconvolution of WAXS patterns of the unmodified PLLA (a); the PLLA/HAp (b); the PLLA/1 mol%  $\text{Eu}^{3+}$ :HAp (c); the PLLA/3 mol%  $\text{Eu}^{3+}$ :HAp (d) and the PLLA/5 mol%  $\text{Eu}^{3+}$ :HAp (e).

44

45

46

47

48

49

50

The IR spectra of HAp consist of typical active vibrational bands of phosphate groups ( $\text{PO}_4^{3-}$ ) at  $472.2\text{ cm}^{-1}$  ( $\nu_2$ ),  $564.5\text{ cm}^{-1}$  ( $\nu_4$ ),  $601.8\text{ cm}^{-1}$  ( $\nu_4$ ),  $965.5\text{ cm}^{-1}$  ( $\nu_1$ ),  $1033.7\text{ cm}^{-1}$  ( $\nu_3$ ) and  $1091.5\text{ cm}^{-1}$  ( $\nu_3$ ). The  $1033.7$  and  $1091.5\text{ cm}^{-1}$  vibrational bands are the triply degenerate  $\nu_3$  antisymmetric stretching of the phosphate groups (see **Figure S7**). The  $965.5\text{ cm}^{-1}$  band is the non-degenerate  $\nu_1$  symmetric stretching of the  $\text{PO}_4^{3-}$  groups. The  $564.5$  and  $601.8\text{ cm}^{-1}$  peaks are the triply degenerate  $\nu_4$  vibration of the O–P–O groups, and the  $472.2\text{ cm}^{-1}$  peak is the doubly degenerate  $\nu_2$  bending of the O–P–O bonds. The vibrational transition at  $3424\text{ cm}^{-1}$  corresponds to a stretching mode ( $\nu(\text{OH})$ ) and those at  $630\text{ cm}^{-1}$

51 and 3571  $\text{cm}^{-1}$  to a vibrational mode (L(OH)) of the  $\text{OH}^-$  groups, what confirms the presence of  
 52 hydroxyl groups in the lattice structure [2,3].

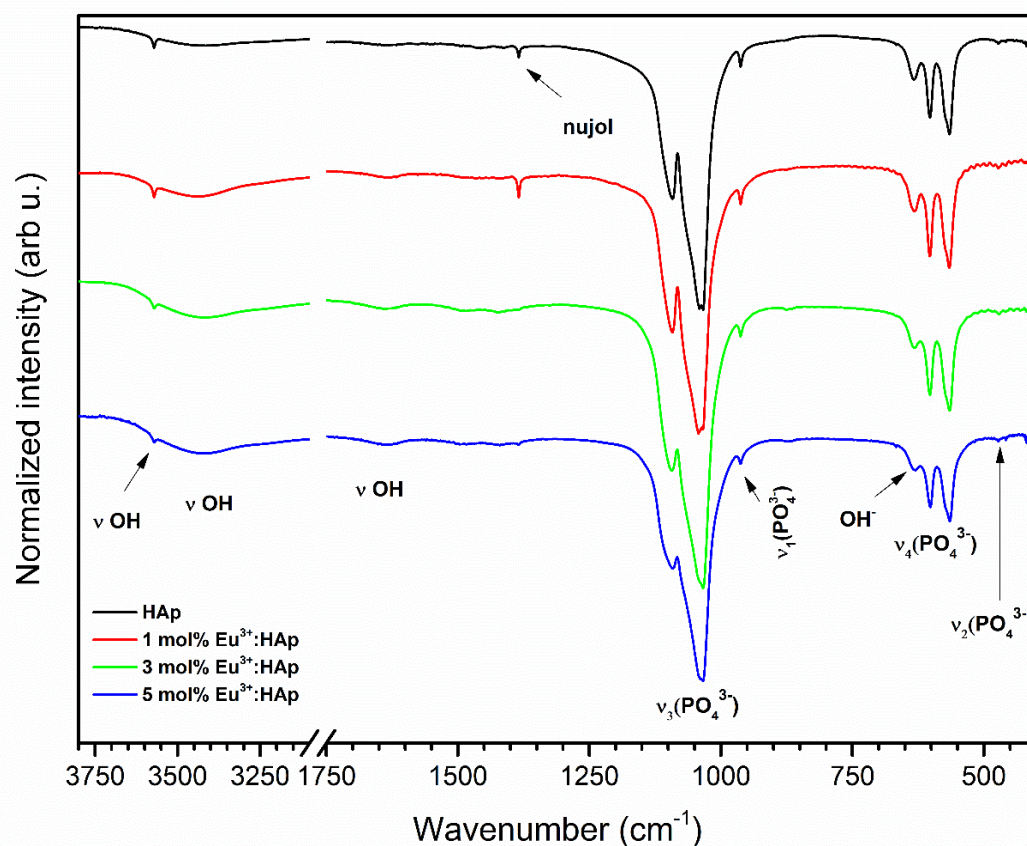

53  
 54 **Figure S7.** IR spectra of the  $\text{Eu}^{3+}:\text{Ca}_{10}(\text{PO}_4)_6(\text{OH})_2$  nanoparticles as a function of optically active ions  
 55 concentration.

56 S3.3. *Thermal properties*

57 **Table S1.** The thermal parameters from the first heating DSC curves.

| sample                                      | $T_g$<br>( $^{\circ}\text{C}$ ) | $T_{cc}^{\text{onset}}$<br>( $^{\circ}\text{C}$ ) | $T_{cc}$<br>( $^{\circ}\text{C}$ ) | $\Delta H_{cc}$<br>( $\text{J/g}$ ) | $T_{\alpha-\alpha}$<br>( $^{\circ}\text{C}$ ) | $\Delta H_{\alpha-\alpha}$<br>( $\text{J/g}$ ) | $T_m$<br>( $^{\circ}\text{C}$ ) | $\Delta H_m$<br>( $\text{J/g}$ ) |
|---------------------------------------------|---------------------------------|---------------------------------------------------|------------------------------------|-------------------------------------|-----------------------------------------------|------------------------------------------------|---------------------------------|----------------------------------|
| PLLA                                        | 61.1                            | 91.6                                              | 95.6                               | -34.56                              | 159.2                                         | -7.89                                          | 180.9                           | 46.68                            |
| PLLA/HAp                                    | 59.8                            | 89.0                                              | 92.6                               | -34.86                              | 160.5                                         | -6.57                                          | 178.6                           | 46.78                            |
| PLLA/<br>1 mol% $\text{Eu}^{3+}:\text{HAp}$ | 62.3                            | 84.0                                              | 88.7                               | -22.29                              | 160.8                                         | -6.32                                          | 177.2                           | 46.98                            |
| PLLA/<br>3 mol% $\text{Eu}^{3+}:\text{HAp}$ | 59.4                            | 82.2                                              | 87.5                               | -20.99                              | 159.5                                         | -6.69                                          | 177.3                           | 47.60                            |
| PLLA/<br>5 mol% $\text{Eu}^{3+}:\text{HAp}$ | 61.0                            | 82.6                                              | 87.5                               | -20.78                              | 159.7                                         | -6.66                                          | 177.4                           | 47.10                            |

58 **Table S2.** The thermal parameters from the cooling DSC curves.

| sample   | $T_c^{\text{onset}}$<br>( $^{\circ}\text{C}$ ) | $T_c$<br>( $^{\circ}\text{C}$ ) | $\Delta H_c$<br>( $\text{J/g}$ ) | $T_g$<br>( $^{\circ}\text{C}$ ) |
|----------|------------------------------------------------|---------------------------------|----------------------------------|---------------------------------|
| PLLA     | 114.8                                          | 107.7                           | -32.79                           | 67.1                            |
| PLLA/HAp | 117.1                                          | 110.5                           | -36.34                           | 64.7                            |

|                                   |       |       |        |      |
|-----------------------------------|-------|-------|--------|------|
| PLLA/1 mol% Eu <sup>3+</sup> :HAp | 132.9 | 125.6 | -44.93 | 62.4 |
| PLLA/3 mol% Eu <sup>3+</sup> :HAp | 133.9 | 127.6 | -45.35 | 61.7 |
| PLLA/5 mol% Eu <sup>3+</sup> :HAp | 131.9 | 124.1 | -43.33 | 62.5 |

59

Table S3. The thermal parameters from the second heating DSC curves.

| sample                               | T <sub>g</sub><br>(°C) | T <sub>α'-α</sub><br>(°C) | ΔH <sub>α'-α</sub><br>(J/g) | T <sub>m</sub><br>(°C) | T <sub>m2</sub><br>(°C) | ΔH <sub>m</sub><br>(J/g) |
|--------------------------------------|------------------------|---------------------------|-----------------------------|------------------------|-------------------------|--------------------------|
| PLLA                                 | 65.8                   | 164.5                     | -2.51                       | 179.9                  | -                       | 42.30                    |
| PLLA/HAp                             | 65.1                   | 165.8                     | -1.06                       | 179.4                  | -                       | 44.16                    |
| PLLA/1<br>mol% Eu <sup>3+</sup> :HAp | 66.8                   | -                         | -                           | 176.1                  | 181.2                   | 51.12                    |
| PLLA/3<br>mol% Eu <sup>3+</sup> :HAp | 62.8                   | -                         | -                           | 176.4                  | 181.2                   | 51.39                    |
| PLLA/5<br>mol% Eu <sup>3+</sup> :HAp | 62.8                   | -                         | -                           | 175.9                  | 181.2                   | 49.67                    |

60

## S3.4. Spectroscopic properties

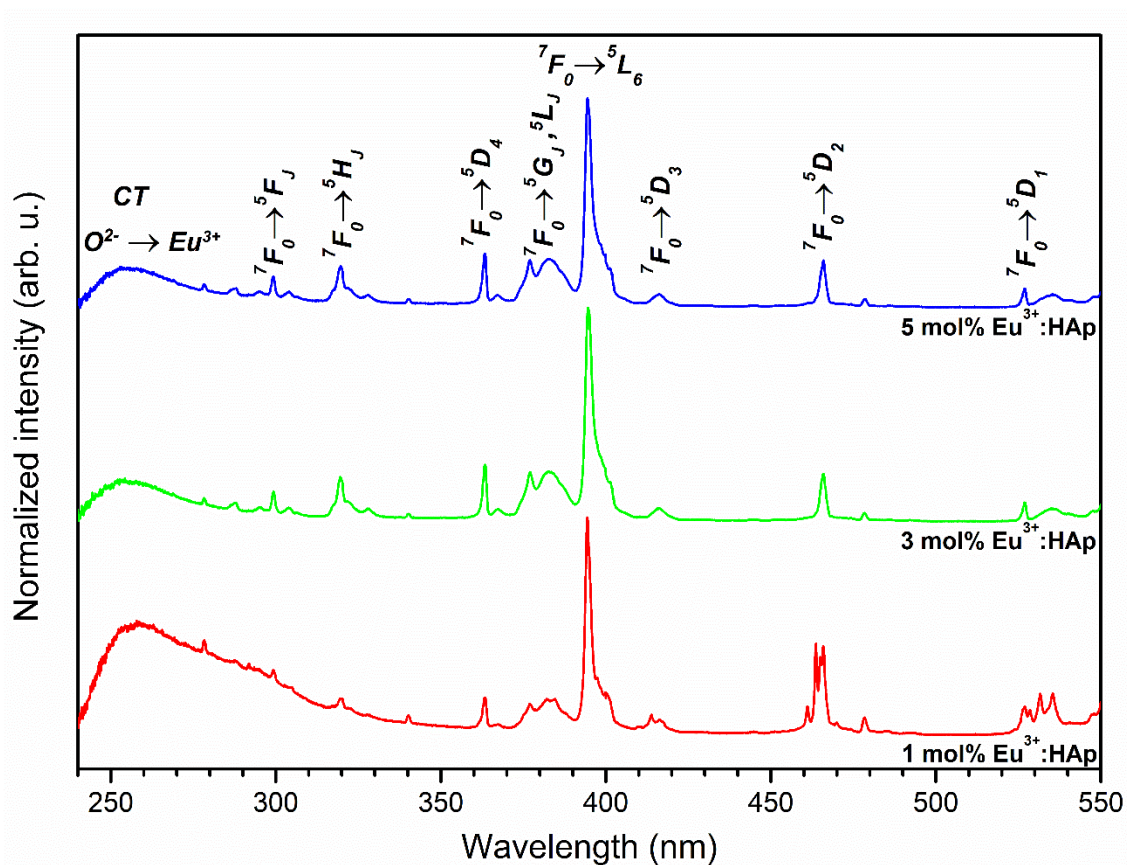

61

62

63

Figure S8. Excitation spectra of the Ca<sub>10</sub>(PO<sub>4</sub>)<sub>6</sub>(OH)<sub>2</sub>:Eu<sup>3+</sup> nanoparticles as a function of optically active ions.

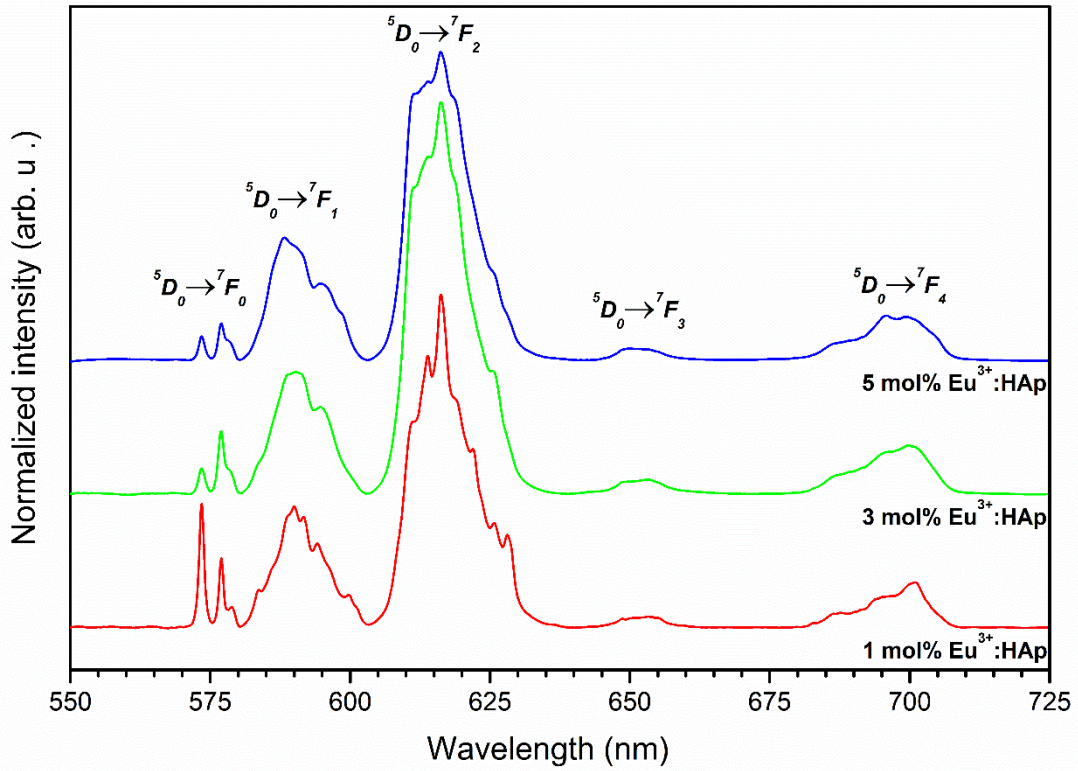

64

65

66

Figure S9. Emission spectra of the  $\text{Ca}_{10}(\text{PO}_4)_6(\text{OH})_2:\text{Eu}^{3+}$  nanoparticles as a function of optically active ions.

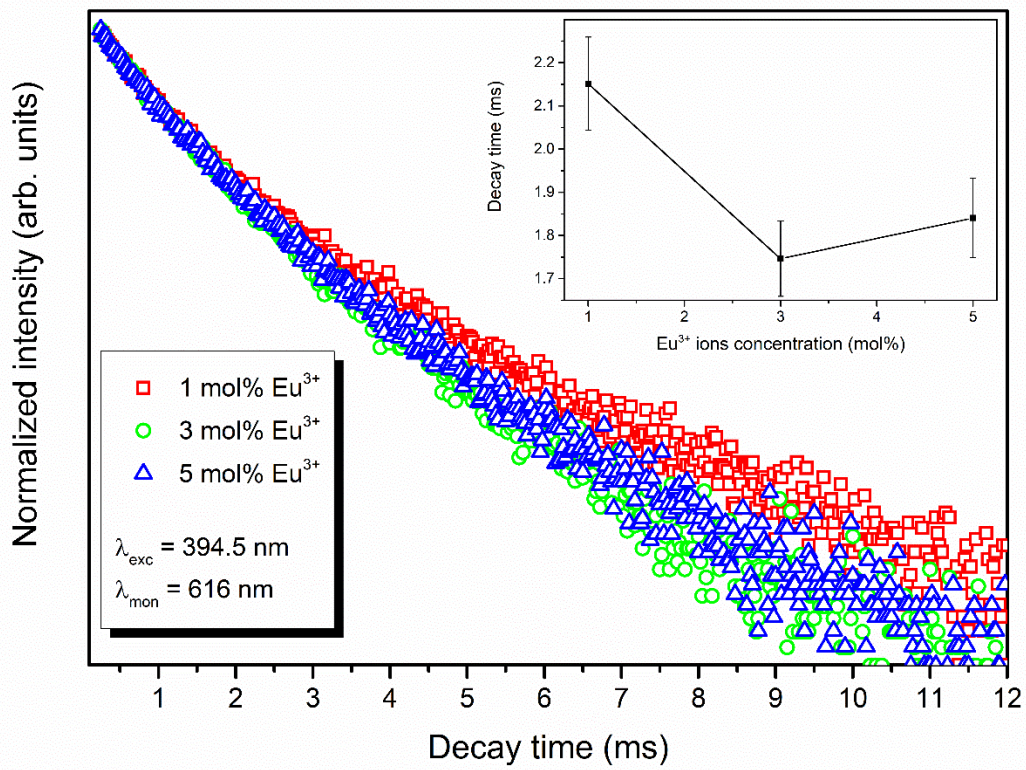

67

68

69

Figure S10. Life times of the  $\text{Ca}_{10}(\text{PO}_4)_6(\text{OH})_2:\text{Eu}^{3+}$  nanoparticles as a function of optically active ions.



**70 References**

- 71 1. Balan, E.; Delattre, S.; Roche, D.; Segalen, L.; Morin, G.; Guillaumet, M.; Blanchard, M.; Lazzeri, M.;  
72 Brouder, C.; Salje, E.K.H. Line-broadening effects in the powder infrared spectrum of apatite. *Phys. Chem.*  
73 *Miner.* **2011**, *38*, 111–122, doi:10.1007/s00269-010-0388-x.
- 74 2. Guerra-López, J.R.; Echeverría, G.A.; Güida, J.A.; Viña, R.; Punte, G. Synthetic hydroxyapatites doped  
75 with Zn(II) studied by X-ray diffraction, infrared, Raman and thermal analysis. *J. Phys. Chem. Solids* **2015**,  
76 *81*, 57–65, doi:10.1016/j.jpcs.2015.01.017.
- 77 3. Yuan, Q.; Wu, J.; Qin, C.; Xu, A.; Zhang, Z.; Lin, S.; Ren, X.; Zhang, P. Spin-coating synthesis and  
78 characterization of Zn-doped hydroxyapatite/polylactic acid composite coatings. *Surf. Coatings Technol.*  
79 **2016**, *307*, 461–469, doi:10.1016/j.surfcoat.2016.09.021.
